# Supplementary material for: Strengthening leadership as a catalyst for enhanced patient safety culture: a repeated cross-sectional experimental study
Source: PubMed Central journal article supplement — BMJ Open. 2016 May 13;6(5):e010180. doi: 10.1136/bmjopen-2015-010180 (PMC4874125; doi:10.1136/bmjopen-2015-010180), 2016-05-13
Supplement: bmjopen-2015-010180supp.pdf [file bmjopen-2015-010180supp.pdf]

## ANNEX

**Table 1a Number of invitees versus number of participants across the two patient safety culture surveys**

| Status of participation | Status of invitation (Group of invitee) |                          |                             | Total<br>N |
|-------------------------|-----------------------------------------|--------------------------|-----------------------------|------------|
|                         | First survey only<br>N (%)              | Both surveys<br>N (%)    | Second survey only<br>N (%) |            |
| No participation at all | 15 (24.2%)                              | 50 (12.8%)               | 22 (28.2%)                  | <b>87</b>  |
| First survey only       | 47 (75.8%) <sup>1</sup>                 | 73 (18.6%) <sup>2</sup>  | -                           | <b>120</b> |
| Both surveys            | -                                       | 238 (60.7%) <sup>3</sup> | -                           | <b>238</b> |
| Second survey only      | -                                       | 31 (7.9%) <sup>4</sup>   | 56 (71.8%) <sup>5</sup>     | <b>87</b>  |
| <b>Total (N)</b>        | <b>62 (100%)</b>                        | <b>392 (100%)</b>        | <b>78 (100%)</b>            | <b>532</b> |

<sup>1</sup> Leavers; participating in the first survey, then leaving the department, N=47

<sup>2</sup> Dropouts; invitees in both surveys, but only participating in the first survey, N=73

<sup>3</sup> Stable; participants in both surveys, N=238

<sup>4</sup> Laggards; invitees in both surveys, but only participating in the second survey, N=31

<sup>5</sup> New comers; staff joining the department after the first survey, and participating in the second survey only, N=56

Table 2a Difference in means across the two surveys according to organisational role and gender<sup>1</sup>

| Population (size)<br>Patient safety culture dimension | Mean difference <sup>2</sup> | SD          | T-value <sup>3</sup> | Df <sup>4</sup> | P-value     |
|-------------------------------------------------------|------------------------------|-------------|----------------------|-----------------|-------------|
| <b>Frontline clinicians (N=223)</b>                   |                              |             |                      |                 |             |
| Teamwork climate                                      | <b>3.2</b>                   | <b>17.1</b> | <b>2.8</b>           | <b>221</b>      | <b>0.01</b> |
| Safety climate                                        | <b>5.1</b>                   | <b>17.1</b> | <b>4.4</b>           | <b>221</b>      | <b>0.00</b> |
| Job satisfaction                                      | <b>5.2</b>                   | <b>17.8</b> | <b>4.4</b>           | <b>222</b>      | <b>0.00</b> |
| Stress recognition                                    | 0.2                          | 19.2        | 0.2                  | 221             | 0.85        |
| Perceptions of unit mgmt.                             | <b>5.6</b>                   | <b>20.4</b> | <b>4.1</b>           | <b>221</b>      | <b>0.00</b> |
| Perceptions of department mgmt.                       | <b>2.8</b>                   | <b>17.9</b> | <b>2.3</b>           | <b>222</b>      | <b>0.02</b> |
| Working conditions                                    | <b>3.5</b>                   | <b>22.6</b> | <b>2.3</b>           | <b>219</b>      | <b>0.02</b> |
| <b>Leaders (N=15)</b>                                 |                              |             |                      |                 |             |
| Teamwork climate                                      | 1.1                          | 22.5        | 0.2                  | 14              | 0.86        |
| Safety climate                                        | 0.0                          | 25.7        | 0.0                  | 14              | 1.00        |
| Job satisfaction                                      | 7.3                          | 29.4        | 1.0                  | 14              | 0.35        |
| Stress recognition                                    | <b>12.9</b>                  | <b>21.7</b> | <b>2.3</b>           | <b>14</b>       | <b>0.04</b> |
| Perceptions of unit mgmt.                             | 0.5                          | 16.1        | 0.1                  | 14              | 0.91        |
| Perceptions of department mgmt.                       | 2.0                          | 13.6        | 0.6                  | 14              | 0.58        |
| Working conditions                                    | 1.7                          | 21.2        | 0.3                  | 14              | 0.76        |
| <b>Female (N=192)</b>                                 |                              |             |                      |                 |             |
| Teamwork climate                                      | <b>2.8</b>                   | <b>17.9</b> | <b>2.2</b>           | <b>190</b>      | <b>0.03</b> |
| Safety climate                                        | <b>4.7</b>                   | <b>17.8</b> | <b>3.7</b>           | <b>190</b>      | <b>0.00</b> |
| Job satisfaction                                      | <b>4.8</b>                   | <b>19.5</b> | <b>3.4</b>           | <b>191</b>      | <b>0.00</b> |
| Stress recognition                                    | 0.5                          | 19.0        | 0.3                  | 191             | 0.74        |
| Perceptions of unit mgmt.                             | <b>5.7</b>                   | <b>19.5</b> | <b>4.1</b>           | <b>190</b>      | <b>0.00</b> |
| Perceptions of department mgmt.                       | <b>2.5</b>                   | <b>16.9</b> | <b>2.0</b>           | <b>191</b>      | <b>0.05</b> |
| Working conditions                                    | <b>3.1</b>                   | <b>22.2</b> | <b>1.9</b>           | <b>189</b>      | <b>0.06</b> |
| <b>Male (N=46)</b>                                    |                              |             |                      |                 |             |
| Teamwork climate                                      | 4.0                          | 15.7        | 1.7                  | 45              | 0.09        |
| Safety climate                                        | 4.9                          | 17.6        | 1.9                  | 45              | 0.07        |
| Job satisfaction                                      | <b>7.9</b>                   | <b>14.3</b> | <b>3.7</b>           | <b>45</b>       | <b>0.00</b> |
| Stress recognition                                    | 1.2                          | 22.0        | 0.4                  | 44              | 0.73        |
| Perceptions of unit mgmt.                             | 3.3                          | 22.7        | 1.0                  | 45              | 0.34        |
| Perceptions of department mgmt.                       | 3.9                          | 20.4        | 1.3                  | 45              | 0.20        |
| Working conditions                                    | 4.7                          | 23.7        | 1.3                  | 44              | 0.19        |

<sup>1</sup> Results in bold are statistical significant at p<0.05

<sup>2</sup> A positive mean difference signifies that the mean of the second survey is higher than the one of the first

<sup>3</sup> Paired sample T-test

<sup>4</sup> Degrees of freedom

Table 3a Difference in means across the two surveys for different professional groups<sup>1</sup>

| Population (size)<br>Patient safety culture dimension                                    | Mean difference <sup>2</sup> | SD          | T-value <sup>3</sup> | Df <sup>4</sup> | P-value     |
|------------------------------------------------------------------------------------------|------------------------------|-------------|----------------------|-----------------|-------------|
| <b>Doctors (N=23)</b>                                                                    |                              |             |                      |                 |             |
| Teamwork climate                                                                         | 1.2                          | 15.9        | 0.4                  | 22              | 0.71        |
| Safety climate                                                                           | 5.6                          | 16.1        | 1.7                  | 22              | 0.11        |
| Job satisfaction                                                                         | <b>8.7</b>                   | <b>13.3</b> | <b>3.2</b>           | <b>22</b>       | <b>0.00</b> |
| Stress recognition                                                                       | 7.4                          | 22.5        | 1.5                  | 21              | 0.14        |
| Perceptions of unit mgmt.                                                                | <b>13.4</b>                  | <b>24.0</b> | <b>2.7</b>           | <b>22</b>       | <b>0.01</b> |
| Perceptions of department mgmt.                                                          | 4.8                          | 17.6        | 1.3                  | 22              | 0.20        |
| Working conditions                                                                       | 2.7                          | 19.3        | 0.6                  | 21              | 0.53        |
| <b>Nurses (N=95)</b>                                                                     |                              |             |                      |                 |             |
| Teamwork climate                                                                         | 3.0                          | 19.5        | 1.5                  | 94              | 0.14        |
| Safety climate                                                                           | <b>4.6</b>                   | <b>18.8</b> | <b>2.4</b>           | <b>94</b>       | <b>0.02</b> |
| Job satisfaction                                                                         | 3.1                          | 20.6        | 1.5                  | 94.0            | 0.1         |
| Stress recognition                                                                       | 1.9                          | 17.9        | 1.0                  | 94.0            | 0.3         |
| Perceptions of unit mgmt.                                                                | 3.3                          | 18.8        | 1.7                  | 94.0            | 0.1         |
| Perceptions of department mgmt.                                                          | 0.6                          | 16.2        | 0.4                  | 94.0            | 0.7         |
| Working conditions                                                                       | <b>4.5</b>                   | <b>20.3</b> | <b>2.1</b>           | <b>94</b>       | <b>0.03</b> |
| <b>Nurse assistants or alike and pedagogues (N=49)</b>                                   |                              |             |                      |                 |             |
| Teamwork climate                                                                         | 4.2                          | 16.1        | 1.8                  | 48              | 0.08        |
| Safety climate                                                                           | <b>5.5</b>                   | <b>18.8</b> | <b>2.1</b>           | <b>48</b>       | <b>0.05</b> |
| Job satisfaction                                                                         | <b>8.2</b>                   | <b>19.3</b> | <b>3.0</b>           | <b>48</b>       | <b>0.00</b> |
| Stress recognition                                                                       | 0.9                          | 23.8        | 0.3                  | 48              | 0.8         |
| Perceptions of unit mgmt.                                                                | <b>5.1</b>                   | <b>18.0</b> | <b>2.0</b>           | <b>48</b>       | <b>0.05</b> |
| Perceptions of department mgmt.                                                          | 1.4                          | 20.6        | 0.5                  | 48              | 0.64        |
| Working conditions                                                                       | 5.7                          | 24.7        | 1.6                  | 48              | 0.11        |
| <b>Psychologists, physiotherapists, occupational therapists, music therapists (N=41)</b> |                              |             |                      |                 |             |
| Teamwork climate                                                                         | 4.2                          | 15.0        | 1.8                  | 40              | 0.08        |
| Safety climate                                                                           | 3.0                          | 17.4        | 1.1                  | 40              | 0.27        |
| Job satisfaction                                                                         | <b>6.6</b>                   | <b>13.3</b> | <b>3.2</b>           | <b>40</b>       | <b>0.00</b> |
| Stress recognition                                                                       | 0.9                          | 15.7        | 0.4                  | 40              | 0.73        |
| Perceptions of unit mgmt.                                                                | 2.1                          | 23.4        | 0.6                  | 40              | 0.57        |
| Perceptions of department mgmt.                                                          | 4.2                          | 13.7        | 1.9                  | 40              | 0.06        |
| Working conditions                                                                       | 1.5                          | 19.3        | 0.5                  | 40              | 0.62        |
| <b>Social workers and secretaries (N=30)</b>                                             |                              |             |                      |                 |             |
| Teamwork climate                                                                         | 1.3                          | 17.8        | 0.4                  | 28              | 0.70        |
| Safety climate                                                                           | <b>5.9</b>                   | <b>14.8</b> | <b>2.1</b>           | <b>28</b>       | <b>0.04</b> |
| Job satisfaction                                                                         | 3.6                          | 20.7        | 1.0                  | 29              | 0.35        |
| Stress recognition                                                                       | 4.4                          | 19.0        | 1.3                  | 29              | 0.22        |
| Perceptions of unit mgmt.                                                                | <b>10.0</b>                  | <b>18.6</b> | <b>2.9</b>           | <b>28</b>       | <b>0.01</b> |
| Perceptions of department mgmt.                                                          | <b>8.0</b>                   | <b>20.8</b> | <b>2.1</b>           | <b>29</b>       | <b>0.04</b> |
| Working conditions                                                                       | 0.9                          | 31.1        | 0.2                  | 27              | 0.88        |

<sup>1</sup> Results in bold are statistical significant at p<0.05

<sup>2</sup> A positive mean difference signifies that the mean of the second survey is higher than the one of the first

<sup>3</sup> Paired sample T-test

<sup>4</sup> Degrees of freedom
